# Supplementary material for: Cancer-specific alterations in nuclear matrix proteins determined by multi-omics analyses of ductal carcinoma in situ
Source: PubMed Central journal article supplement (PMC11333849; doi:10.3389/fonc.2024.1406946), 2024-08-06
Supplement: DataSheet_1.pdf [file DataSheet_1.pdf]

**Supplementary Table 1. Clinical characteristics of non-diseased and breast cancer PDCEEs used in this study.**

| PDCEE                                                      | Tumor Stage | Molecular Subtype   |
|------------------------------------------------------------|-------------|---------------------|
| JL-BRL-6<br>(Breast Reduction<br>mammoplasty PDCEE)        |             |                     |
| JL-Contra-3<br>Contralateral Breast<br>PDCEE for JL-DCIS-3 |             |                     |
| JL-DCIS-3                                                  | Stage 0     | Luminal A           |
| JL-BTL-4                                                   | Stage I     | Luminal B           |
| JL-BTL-8                                                   | Stage I     | Luminal A           |
| JL-BTL-33                                                  | Stage I     | Luminal A           |
| JL-BTL-37                                                  | Stage I     | Luminal A           |
| JL-BTL-9                                                   | Stage II    | Luminal A           |
| JL-BTL-10                                                  | Stage II    | TNBC                |
| JL-BTL-29                                                  | Stage II    | TNBC                |
| JL-BTL-46                                                  | Stage II    | Her2 overexpressing |
| JL-BTL-12                                                  | Stage III   | Luminal A           |
|                                                            |             |                     |
| JL-BTL-21                                                  | Stage IV    | Luminal B like      |
| JL-BTL-60                                                  | Stage IV    | TNBC                |
| MDA-MB231                                                  | Stage IV    | TNBC                |
| MCF-7                                                      | Stage IV    | Luminal A           |

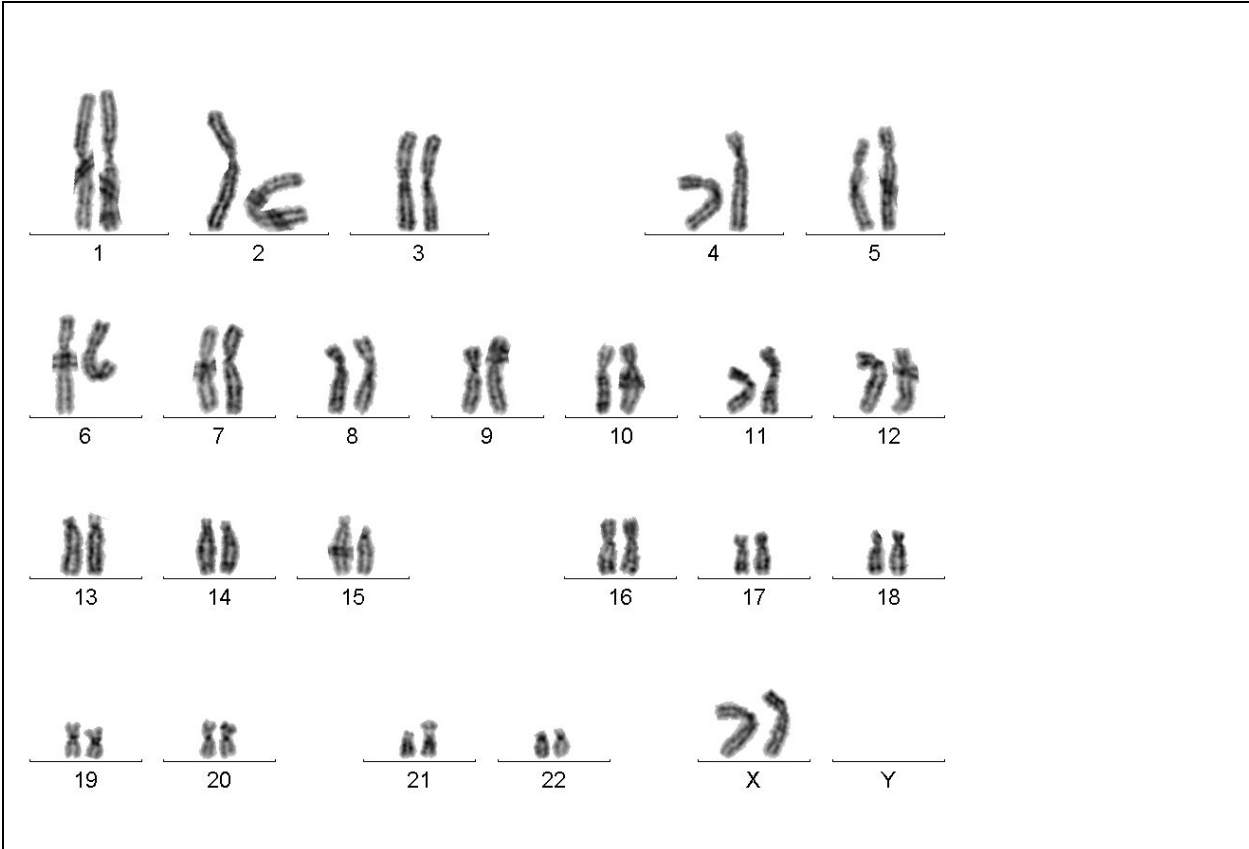

**Supplementary Figure 1A.** Karyotype of JL-Contra-3 PDCEE showing a diploid normal female chromosome complement.

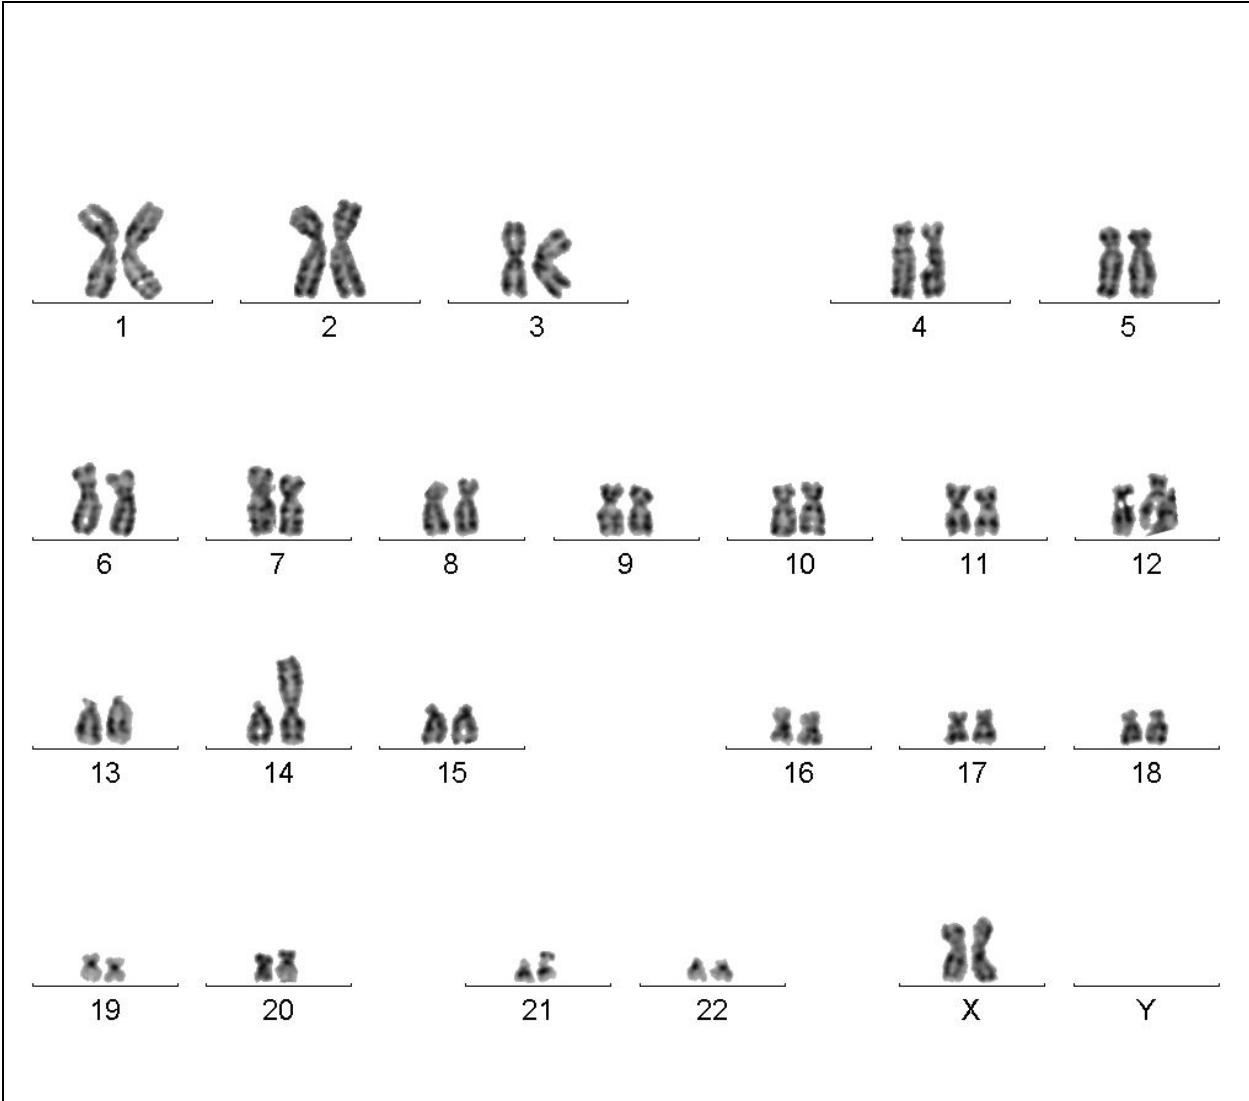

**Supplementary Figure 1B.** Karyotype of JL-DCIS-3 PDCEE showing a derivative chromosome 14 with an extra copy of 5q. This karyotype represents a prominent subclone of this patient-derived culture.

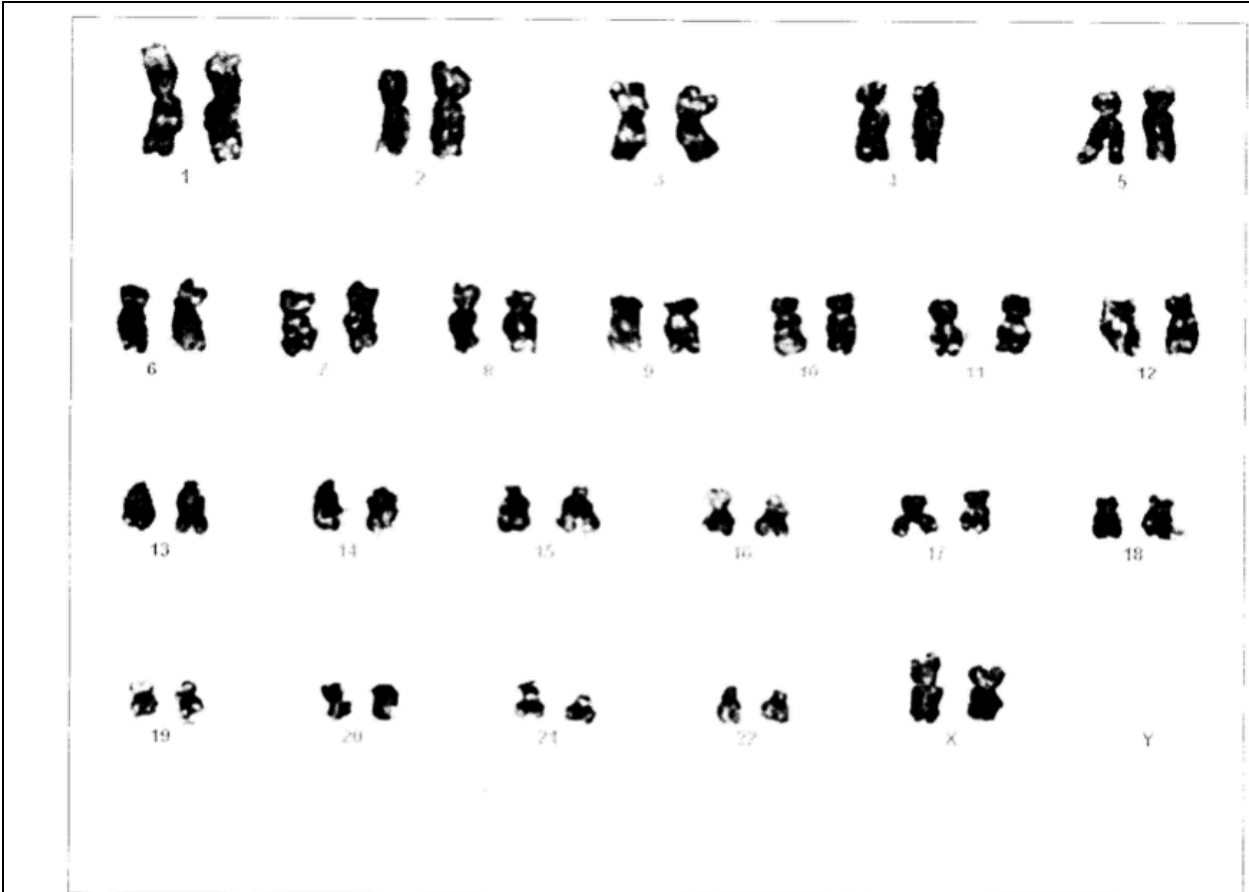

**Supplementary Figure 1C.** Karyotype of JL-BRL-6 PDCEE showing a diploid normal female chromosome complement.

**Supplementary Table 2. NMPs Identified by Proteomics**

|     | <b>Protein Name</b>                                          | <b>Protein Symbol</b> | <b>Fold change JL-DCIS-3 relative to JL-Contra-3</b> | <b>P value</b> |
|-----|--------------------------------------------------------------|-----------------------|------------------------------------------------------|----------------|
| 1.  | Vimentin                                                     | VIM                   | 1.69 (↓)                                             | 0.000          |
| 2.  | 40S ribosomal protein S3                                     | RPS3                  | 1.07 (↓)                                             | 0.846          |
| 3.  | High mobility group protein B3                               | HMGB3                 | 1.42 (↓)                                             | 0.597          |
| 4.  | 40S ribosomal protein S7                                     | RPS7                  | 1.81 (↓)                                             | 0.007          |
| 5.  | Neuroblast differentiation-associated protein AHNAK          | AHNAK                 | 5.35 (↓)                                             | 0.000          |
| 6.  | Nucleolin                                                    | NCL                   | 3.65 (↓)                                             | 0.000          |
| 7.  | Keratin, type II cytoskeletal 8                              | KRT8                  | 1.45 (↓)                                             | 0.038          |
| 8.  | Isoform B1 of hnRNP A2/B1                                    | HNRNPA2B1             | 1.78 (↓)                                             | 0.111          |
| 9.  | Isoform 1 of Nucleophosmin                                   | NPM1                  | 4.98 (↓)                                             | 0.000          |
| 10. | Lamin-B2                                                     | LMNB2                 | 1.19 (↓)                                             | 0.207          |
| 11. | Histone H1.2                                                 | HIST1H1C              | 2.38 (↓)                                             | 0.710          |
| 12. | Putative elongation factor 1-alpha-like                      | EEF1A1                | 1.84 (↓)                                             | 0.155          |
| 13. | Myosin regulatory light chain MRLC2                          | MYL12B                | 1.05 (↓)                                             | 0.059          |
| 14. | 60 kDa heat shock protein                                    | HSPD1                 | 1.21 (↓)                                             | 0.338          |
| 15. | High mobility group protein B1                               | HMGB1                 | 4.51 (↓)                                             | 0.039          |
| 16. | Putative uncharacterized protein DKFZp564G0422               | ATPIF1                | 1.16 (↓)                                             | 0.723          |
| 17. | Isoform 1 of Myosin-9                                        | MYH9                  | 1.01 (↓)                                             | 0.958          |
| 18. | Activated RNA polymerase II transcriptional coactivator p15  | SUB1                  | 3.01 (↓)                                             | 0.188          |
| 19. | cDNA FLJ56329, highly similar to myosin light polypeptide 6  | MYL6B                 | 1.36 (↓)                                             | 0.393          |
| 20. | Putative uncharacterized protein MSN (Fragment)              | MSN                   | 2.46 (↓)                                             | 0.103          |
| 21. | Transcription factor A, mitochondrial                        | TFAM                  | 1.62 (↓)                                             | 0.143          |
| 22. | Isoform A1-A of hnRNP A1                                     | HNRNPA1               | 6.42 (↓)                                             | 0.008          |
| 23. | Isoform 1 of Heat shock cognate 71 kDa protein               | HSPA8                 | 1.17 (↓)                                             | 0.617          |
| 24. | Eukaryotic translation elongation factor 1 delta isoform 3   | EEF1D                 | 1.27 (↓)                                             | 0.504          |
| 25. | Stress-70 protein, mitochondrial                             | HSPA9                 | 1.03 (↓)                                             | 0.906          |
| 26. | Isoform long of splicing factor, proline- and glutamine-rich | SFPQ                  | 2.34 (↓)                                             | 0.000          |
| 27. | Isoform 1 of hnRNP H3                                        | HNRNPH3               | 1.25 (↓)                                             | 0.233          |
| 28. | 51 kDa protein                                               | HNRNPH1               | 3.73 (↓)                                             | 0.041          |
| 29. | hnRNP F                                                      | HNRNPF                | 1.31 (↓)                                             | 0.403          |

|     |                                                                                                     |              |          |       |
|-----|-----------------------------------------------------------------------------------------------------|--------------|----------|-------|
| 30. | Putative uncharacterized protein hnRNP AB                                                           | HNRNPAB      | 2.59 (↓) | 0.002 |
| 31. | Isoform 3 of clathrin light chain A                                                                 | CLTA         | 1.18 (↓) | 0.712 |
| 32. | Keratin 7                                                                                           | KRT7         | 1.43 (↓) | 0.134 |
| 33. | Elongation factor 1-beta                                                                            | EEF1B2       | 3.03 (↓) | 0.002 |
| 34. | Isoform 1 of hnRNP Q                                                                                | SYNCRIP Q    | 1.78 (↓) | 0.413 |
| 35. | Isoform 1 of protein disulfide-isomerase A6                                                         | PDIA6        | 1.18 (↓) | 0.575 |
| 36. | Protein disulfide-isomerase A3                                                                      | PDIA3        | 1.30 (↓) | 0.095 |
| 37. | Putative uncharacterized protein SPTAN1                                                             | SPTAN1       | 1.99 (↓) | 0.000 |
| 38. | Filamin B                                                                                           | FLNB         | 1.14 (↓) | 0.755 |
| 39. | Peroxiredoxin-1                                                                                     | PRDX1        | 1.29 (↓) | 0.237 |
| 40. | Isoform 2 of hnRNP M                                                                                | HNRNPM       | 1.54 (↓) | 0.034 |
| 41. | Hepatoma-derived growth factor                                                                      | HDGF         | 1.79 (↓) | 0.285 |
| 42. | Endoplasmic                                                                                         | HSP90B1      | 2.29 (↓) | 0.005 |
| 43. | Peptidyl-prolyl cis-trans isomerase B                                                               | PPIB         | 1.62 (↓) | 0.238 |
| 44. | Transitional endoplasmic reticulum ATPase                                                           | VCP          | 1.51 (↓) | 0.191 |
| 45. | High mobility group protein B2                                                                      | HMGB2        | 4.51 (↓) | 0.039 |
| 46. | DnaJ homolog subfamily B member 11                                                                  | DNAJB11      | 1.45 (↓) | 0.531 |
| 47. | 45 kDa protein                                                                                      | ALDOA        | 1.73 (↓) | 0.736 |
| 48. | Histone H1.4                                                                                        | HIST1H1E     | 5.57 (↓) | 0.023 |
| 49. | THO complex subunit 4                                                                               | THOC4        | 4.78 (↓) | 0.043 |
| 50. | HSPA1A cDNA FLJ54392, highly similar to heat shock 70 kDa protein 1                                 | HSPA1B       | 1.09 (↓) | 0.882 |
| 51. | Non-POU domain-containing octamer-binding protein                                                   | NONO         | 2.31 (↓) | 0.002 |
| 52. | Enhancer of rudimentary homolog                                                                     | ERH          | 2.71 (↓) | 0.061 |
| 53. | Putative uncharacterized protein hnRNP D                                                            | HNRNPD       | 1.25 (↓) | 0.472 |
| 54. | Fus-like protein (Fragment)                                                                         | FUS          | 4.66 (↓) | 0.220 |
| 55. | 18 kDa protein                                                                                      | Ribosomal 23 | 1.58 (↓) | 0.055 |
| 56. | cDNA FLJ35087 fis, clone PLACE6005546, highly similar to polymerase I and transcript release factor | PTRF         | 2.12 (↓) | 0.151 |
| 57. | Stathmin 1 isoform b                                                                                | STMN1        | 5.06 (↓) | 0.024 |

|     |                                                                    |         |           |        |
|-----|--------------------------------------------------------------------|---------|-----------|--------|
| 58. | Ribosomal protein S21                                              | RPS21   | 2.12 (↓)  | 0.0419 |
| 59. | cDNA FLJ31776 fis, clone NT2RI2008141, highly similar to Calumenin | CALU    | 3.39 (↓)  | 0.068  |
| 60. | Chromobox protein homolog 3                                        | CBX3    | 2.70 (↓)  | 0.047  |
| 61. | Sin3A-associated protein, 18kDa                                    | SAP18   | 1.13 (↓)  | 0.823  |
| 62. | NADH-ubiquinone oxidoreductase flavoprotein 3 isoform a precursor  | NDUFV3  | 1.069 (↓) | 0.899  |
| 63. | 18 kDa protein                                                     | UBC     | 1.80 (↓)  | 0.312  |
| 64. | Isoform 2 of polyadenylate-binding protein 2                       | PABPN1  | 4.20 (↓)  | 0.041  |
| 65. | Isoform brain of clathrin light chain B                            | CLTB    | 2.30 (↓)  | 0.005  |
| 66. | Isoform 3 of hnRNP K                                               | HNRNPK  | 2.20 (↓)  | 0.034  |
| 67. | Splicing factor, arginine/serine-rich 9                            | SFRS9   | 1.48 (↓)  | 0.403  |
| 68. | highly similar to 40S ribosomal protein S20                        | RPS20   | 3.06 (↓)  | 0.173  |
| 69. | LIM domain and actin binding 1 isoform a                           | LIMA1   | 4.16 (↓)  | 0.023  |
| 70. | Alpha-enolase                                                      | ENO1    | 1.01 (↓)  | 0.979  |
| 71. | Nucleoprotein TPR                                                  | TPR     | 1.14 (↓)  | 0.686  |
| 72. | FK506-binding protein 3                                            | FKBP3   | 1.91 (↓)  | 0.272  |
| 73. | Isoform 1 of hnRNP D-like                                          | HNRPDL  | 8.41 (↓)  | 0.015  |
| 74. | Elongation factor 2                                                | EEF2    | 1.44 (↓)  | 0.193  |
| 75. | hnRNP G                                                            | RBMX    | 1.90 (↓)  | 0.037  |
| 76. | Isoform 2 of hnRNP A3                                              | HNRNPA3 | 2.13 (↓)  | 0.001  |
| 77. | Isoform HMG-Y of High mobility group protein HMG-I/HMG-Y           | HMGA1   | 4.03 (↓)  | 0.006  |
| 78. | 69 kDa protein                                                     | EZR     | 4.59 (↓)  | 0.000  |
| 79. | High mobility group protein B3-like-1                              | HMGB3L1 | 1.42 (↓)  | 0.597  |
| 80. | Isoform 2 of ATP synthase subunit d, mitochondrial                 | ATP5H   | 1.39 (↓)  | 0.441  |
| 81. | 19 kDa protein                                                     | LASP1   | 1.72 (↓)  | 0.277  |
| 82. | Small nuclear ribonucleoprotein D2                                 | SNRPD2  | 1.91 (↓)  | 0.361  |
| 83. | Prefoldin subunit 4                                                | PFDN4   | 1.38 (↓)  | 0.430  |
| 84. | Eukaryotic translation initiation factor 3 subunit I               | EIF3I   | 1.20 (↓)  | 0.688  |
| 85. | hnRNP R isoform 1                                                  | HNRNPR  | 1.88 (↓)  | 0.154  |

|      |                                                                           |         |           |       |
|------|---------------------------------------------------------------------------|---------|-----------|-------|
| 86.  | DnaJ homolog subfamily A member 1                                         | DNAJA1  | 1.19 (↓)  | 0.247 |
| 87.  | Stomatin-like protein 2                                                   | STOML2  | 1.01 (↓)  | 0.989 |
| 88.  | PARP1 Poly [ADP-ribose] polymerase 1                                      | PARP1   | 1.10 (↓)  | 0.754 |
| 89.  | Talin-1                                                                   | TLN1    | 1.86 (↓)  | 0.112 |
| 90.  | Isoform 1 of Tropomyosin alpha-4 chain                                    | TPM4    | 2.45 (↓)  | 0.031 |
| 91.  | Heterogeneous nuclear ribonucleoprotein L                                 | HNRNPL  | 1.55 (↓)  | 0.349 |
| 92.  | CAST Isoform 6 of Calpastatin                                             | CAST    | 6.74 (↓)  | 0.012 |
| 93.  | 40S ribosomal protein S17                                                 | RPS17   | 1.81 (↓)  | 0.281 |
| 94.  | Zinc finger protein 185                                                   | ZNF185  | 5.07 (↓)  | 0.033 |
| 95.  | Histone H1.0                                                              | H1FO    | 1.02 (↓)  | 0.898 |
| 96.  | CDC37 Hsp90 co-chaperone Cdc37                                            | CDC37   | 9.36 (↓)  | 0.043 |
| 97.  | Staufen isoform c                                                         | STAU1   | 1.41 (↓)  | 0.257 |
| 98.  | Stress-induced-phosphoprotein 1                                           | STIP1   | 1.33 (↓)  | 0.701 |
| 99.  | Eukaryotic translation initiation factor 3 subunit J                      | EIF3J   | 1.95 (↓)  | 0.054 |
| 100. | Isoform 2 of A-kinase anchor protein 2                                    | AKAP2   | 3.27 (↓)  | 0.075 |
| 101. | EIF1AX;EIF1AP1 Eukaryotic translation initiation factor 1A, X-chromosomal | EIF1AX  | 4.75 (↓)  | 0.345 |
| 102. | CCT2 T-complex protein 1 subunit beta                                     | CCT2    | 1.67 (↓)  | 0.589 |
| 103. | Coiled-coil domain-containing protein 124                                 | CCDC124 | 2.62 (↓)  | 0.155 |
| 104. | Isoform 2 of Coiled-coil domain-containing protein 50                     | CCDC50  | 4.39 (↓)  | 0.237 |
| 105. | Isoform Long of TATA-binding protein-associated factor 2N                 | TAF15   | 3.59 (↓)  | 0.234 |
| 106. | RPS3A 40S ribosomal protein S3a                                           | RPS3A   | 1.01 (↓)  | 0.992 |
| 107. | RPSAP15;RPSA 33 kDa protein                                               | RPSAP15 | 1.821 (↓) | 0.702 |
| 108. | Isoform 1 of Paraspeckle component 1                                      | PSPC1   | 2.11 (↓)  | 0.066 |
| 109. | Vasodilator-stimulated phosphoprotein                                     | VASP    | 1.80 (↓)  | 0.427 |
| 110. | Nuclear migration protein nudC                                            | NUDC    | 2.84 (↓)  | 0.020 |
| 111. | Isoform 3 of Spectrin alpha chain, brain                                  | SPTBN1  | 1.99 (↓)  | 0.000 |



|      |                                                                                               |         |          |       |
|------|-----------------------------------------------------------------------------------------------|---------|----------|-------|
| 112. | RPLP2 60S acidic ribosomal protein P2                                                         | RPLP2   | 2.00 (↓) | 0.382 |
| 113. | Isoform 2 of Splicing factor U2AF 65 kDa subunit                                              | U2AF2   | 1.95 (↓) | 0.082 |
| 114. | Keratin, type I cytoskeletal 9                                                                | KRT9    | 1.02 (↓) | 0.976 |
| 115. | Serine/threonine-protein kinase 10                                                            | STK10   | 1.10 (↓) | 0.722 |
| 116. | Isoform 1 of Adenylyl cyclase-associated protein 1                                            | CAP1    | 3.52 (↓) | 0.304 |
| 117. | SWI/SNF-related matrix-associated actin-dependent regulator of chromatin subfamily A member 5 | SMARCA5 | 1.04 (↓) | 0.841 |
| 118. | cDNA FLJ56016, highly similar to C-1-tetrahydrofolate synthase                                | MTHFD1  | 1.69 (↓) | 0.184 |
| 119. | Protein BUD31 homolog                                                                         | BUD31   | 2.52 (↓) | 0.004 |
| 120. | Isoform 1 of Kinectin                                                                         | KTN1    | 1.16 (↓) | 0.799 |
| 121. | Tyrosyl-tRNA synthetase                                                                       | YARS    | 1.21 (↓) | 0.806 |
| 122. | Radixin, isoform CRA_a                                                                        | RDX     | 1.42 (↓) | 0.703 |
| 123. | Isoform 6 of Microtubule-associated protein 4                                                 | MAP4    | 1.72 (↓) | 0.772 |
| 124. | Tropomodulin-3                                                                                | TMOD3   | 1.82 (↓) | 0.301 |
| 125. | T-complex protein 1 subunit zeta                                                              | CCT6A   | 2.36 (↓) | 0.126 |
| 126. | Isoform 1 of RuvB-like 1                                                                      | RUVBL1  | 1.86 (↓) | 0.355 |
| 127. | -14 kDa protein                                                                               |         | 1.28 (↓) | 0.705 |
| 128. | -19 kDa protein                                                                               |         | 1.34 (↓) | 0.808 |
| 129. | -21 kDa protein                                                                               | CD99    | 2.17 (↓) | 0.139 |
| 130. | Stress-induced-phosphoprotein 1                                                               | STIP1   | 1.33 (↓) | 0.701 |
| 131. | Cell division cycle 5-like protein                                                            | CDC5L   | 1.73 (↓) | 0.290 |
| 132. | Cytochrome c oxidase subunit 5A, mitochondrial                                                | COX5A   | 1.36 (↓) | 0.654 |
| 133. | Isoform Long of Eukaryotic translation initiation factor 4H                                   | EIF4H   | 1.45 (↓) | 0.490 |
| 134. | Putative uncharacterized protein MATR3                                                        | MATR3   | 1.31 (↓) | 0.652 |
| 135. | Isoform Long of Antigen KI-67                                                                 | MKI67   | 4.01 (↓) | 0.461 |
| 136. | RPS6 40S ribosomal protein S6                                                                 | RPS6    | 1.15 (↓) | 0.622 |
| 137. | SNRPB Putative uncharacterized protein SNRPB                                                  | SNRPB   | 1.13 (↓) | 0.787 |
| 138. | Thioredoxin domain-containing protein 5                                                       | TXNDC5  | 1.16 (↓) | 0.553 |
| 139. | EIF3G Eukaryotic translation initiation factor 3 subunit G                                    | EIF3G   | 2.16 (↓) | 0.147 |

|      |                                                                    |         |          |       |
|------|--------------------------------------------------------------------|---------|----------|-------|
| 140. | Isoform 1 of Caprin-1                                              | CAPRIN1 | 1.88 (↓) | 0.401 |
| 141. | Nucleolar protein 16                                               | NOP16   | 3.09 (↓) | 0.182 |
| 142. | Isoform 1 of Transcription intermediary factor 1-beta              | TRIM28  | 1.41 (↓) | 0.736 |
| 143. | BCAS2 Pre-mRNA-splicing factor SPF27                               | BCAS2   | 1.15 (↓) | 0.122 |
| 144. | SEPT7 51 kDa protein                                               | SEPT7   | 1.45 (↓) | 0.078 |
| 145. | HDLBP Vigilin                                                      | HDLBP   | 1.04 (↓) | 0.937 |
| 146. | Isoform 2 of Drebrin                                               | DBN1    | 1.40 (↓) | 0.364 |
| 147. | DNAJB1 DnaJ homolog subfamily B member 1                           | DNAJB1  | 4.05 (↓) | 0.005 |
| 148. | Actinin, alpha 1 isoform a                                         | ACTN1   | 2.97 (↓) | 0.459 |
| 149. | Isoform 2 of Vinculin                                              | VCL     | 1.05 (↓) | 0.873 |
| 150. | TPM1 37 kDa protein                                                | TPM1    | 4.33 (↓) | 0.012 |
| 151. | PRDX3 peroxiredoxin 3 isoform b                                    | PRDX3   | 2.22 (↓) | 0.135 |
| 152. | Isoform 3 of Splicing factor 1                                     | SF1     | 1.31 (↓) | 0.707 |
| 153. | CCT5 T-complex protein 1 subunit epsilon                           | CCT5    | 1.52 (↓) | 0.572 |
| 154. | SNRPD3 Putative uncharacterized protein SNRPD3                     | SNRPD3  | 1.61 (↓) | 0.027 |
| 155. | SRP14 Signal recognition particle 14 kDa protein                   | SRP14   | 1.05 (↓) | 0.915 |
| 156. | DNAJA2 DnaJ homolog subfamily A member 2                           | DNAJA2  | 2.38 (↓) | 0.173 |
| 157. | -52 kDa protein                                                    |         | 1.00     | 1.000 |
| 158. | 60S ribosomal protein L14                                          | RPL14 6 | -        |       |
| 159. | Keratin, type I cytoskeletal 18                                    | KRT18   | 1.41 (↑) | 0.160 |
| 160. | Keratin, type I cytoskeletal 19                                    | KRT19   | 1.01 (↑) | 0.988 |
| 161. | Filamin A, alpha                                                   | FLNA    | 1.55 (↑) | 0.054 |
| 162. | Isoform 3 of plectin-1                                             | PLEC1   | 1.94 (↑) | 0.000 |
| 163. | ATP synthase subunit alpha, mitochondrial                          | ATP5A1  | 2.02 (↑) | 0.039 |
| 164. | 60S ribosomal protein L8                                           | RPL8    | 5.46 (↑) | 0.002 |
| 165. | Isoform ASF-1 of splicing factor, arginine/serine-rich 1           | SFRS1   | 1.10 (↑) | 0.718 |
| 166. | Tubulin beta chain                                                 | TUBB    | 2.26 (↑) | 0.408 |
| 167. | Isoform 2 of polyadenylate-binding protein 1                       | PABPC1  | 1.04 (↑) | 0.873 |
| 168. | Laminin subunit gamma-1                                            | LAMC1   | 9.87 (↑) | 0.038 |
| 169. | Isoform 3 of plasminogen activator inhibitor 1 RNA-binding protein | SERBP1  | 3.58 (↑) | 0.303 |

|      |                                                                  |          |          |       |
|------|------------------------------------------------------------------|----------|----------|-------|
| 170. | Glyceraldehyde-3-phosphate dehydrogenase                         | GAPDH    | 3.53 (↑) | 0.004 |
| 171. | Heat shock protein beta-1                                        | HSPB1    | 2.06 (↑) | 0.023 |
| 172. | Putative uncharacterized protein ALB                             | ALB      | 6.94 (↑) | 0.003 |
| 173. | 28 kDa heat- and acid-stable phosphoprotein                      | PDAP1    | 2.40 (↑) | 0.037 |
| 174. | 40S ribosomal protein S23                                        | RPS23    | 2.20 (↑) | 0.111 |
| 175. | Isoform 1 of triosephosphate isomerase                           | TPI1     | 2.27 (↑) | 0.225 |
| 176. | Annexin A1                                                       | ANXA1    | 2.29 (↑) | 0.014 |
| 177. | 40S ribosomal protein S19                                        | RPS19    | 1.13 (↑) | 0.232 |
| 178. | Tu translation elongation factor                                 | TUFM     | 1.78 (↑) | 0.082 |
| 179. | Keratin, type II cytoskeletal 1                                  | KRT1     | 2.96 (↑) | 0.011 |
| 180. | Splicing factor, arginine/serine-rich 3, isoform CRA_a           | SFRS3    | 1.33 (↑) | 0.001 |
| 181. | Putative uncharacterized protein MECP2 (Fragment)                | MECP2    | 4.66 (↑) | 0.002 |
| 182. | Isoform 2 of DNA-binding protein A                               | CSDA     | 4.60 (↑) | 0.059 |
| 183. | Similar to ribosomal protein L23                                 | RPL23    | 1.59 (↑) | 0.168 |
| 184. | heat shock 90kDa protein 1, alpha isoform 1                      | HSP90AA1 | 1.16 (↑) | 0.692 |
| 185. | Isoform UBF2 of nucleolar transcription factor 1                 | UBTF     | 1.36 (↑) | 0.424 |
| 186. | Transcription factor BTF3 homolog 4                              | BTF3L4   | 2.82 (↑) | 0.172 |
| 187. | 40S ribosomal protein S4, X isoform                              | RPS4X    | 2.39 (↑) | 0.353 |
| 188. | Charged multivesicular body protein 4b                           | CHMP4B   | 1.33 (↑) | 0.074 |
| 189. | Isoform 1 of RNA-binding protein raly                            | RALY     | 1.21 (↑) | 0.464 |
| 190. | Isoform 2 of 60S ribosomal protein L11                           | RPL11    | 3.66 (↑) | 0.021 |
| 191. | Protein disulfide-isomerase                                      | P4HB P   | 3.40 (↑) | 0.068 |
| 192. | 60S ribosomal protein L7a                                        | RPL7A    | 3.95 (↑) | 0.049 |
| 193. | PKM2 cDNA FLJ56065, highly similar to pyruvate kinase isozyme M1 | PKM2     | 2.59 (↑) | 0.097 |
| 194. | 27 kDa protein                                                   | CHCHD3   | 1.09 (↑) | 0.825 |
| 195. | Isoform 1 of caldesmon                                           | CALD1    | 1.50 (↑) | 0.112 |
| 196. | Laminin subunit beta-1                                           | LAMB1    | 1.30 (↑) | 0.396 |
| 197. | Histone H4                                                       | HIST1H4D | 1.11 (↑) | 0.618 |

|      |                                                                                                                  |          |          |       |
|------|------------------------------------------------------------------------------------------------------------------|----------|----------|-------|
| 198. | Isoform 1 of 60S ribosomal protein L12                                                                           | RPL12    | 1.38 (↑) | 0.730 |
| 199. | Putative uncharacterized protein DKFZp686J1372                                                                   | TPM3     | 1.01 (↑) | 0.971 |
| 200. | Peroxiredoxin-2                                                                                                  | PRDX2    | 1.09 (↑) | 0.845 |
| 201. | Isoform 1 of cytoskeleton-associated protein 4                                                                   | CKAP4 I  | 7.55 (↑) | 0.000 |
| 202. | Serpin H1                                                                                                        | SERPINH1 | 1.26 (↑) | 0.684 |
| 203. | HSPA5 protein                                                                                                    | HSPA5    | 1.04 (↑) | 0.846 |
| 204. | Annexin A2 isoform 1                                                                                             | ANXA2    | 1.07 (↑) | 0.685 |
| 205. | p180/ribosome receptor                                                                                           | RRBP1    | 1.55 (↑) | 0.089 |
| 206. | 26S protease regulatory subunit 6A                                                                               | PSMC3    | 1.08 (↑) | 0.753 |
| 207. | 40S ribosomal protein S14                                                                                        | RPS14    | 1.65 (↑) | 0.118 |
| 208. | Nuclease-sensitive element-binding protein 1                                                                     | YBX1     | 1.07 (↑) | 0.860 |
| 209. | Cytochrome c oxidase subunit 5B                                                                                  | COX5B    | 2.45 (↑) | 0.296 |
| 210. | interleukin enhancer binding factor 3 isoform d                                                                  | ILF3     | 1.47 (↑) | 0.237 |
| 211. | Isoform long of hnRNP U                                                                                          | HNRNPU   | 1.01 (↑) | 0.982 |
| 212. | 10 kDa heat shock protein                                                                                        | HSPE1    | 1.01 (↑) | 0.995 |
| 213. | Putative uncharacterized protein RPL31                                                                           | RPL31    | 4.00 (↑) | 0.018 |
| 214. | cDNA FLJ59206, highly similar to Eukaryotic translation initiation factor 4B                                     | FLJ59206 | 1.25 (↑) | 0.771 |
| 215. | 60S ribosomal protein L3                                                                                         | RPL3     | 1.25 (↑) | 0.794 |
| 216. | Isoform 2 of Na(+)/H(+) exchange regulatory cofactor NHE-RF2                                                     | SLC9A3R2 | 2.25 (↑) | 0.417 |
| 217. | Dihydrolipoyllysine-residue succinyltransferase component of 2-oxoglutarate dehydrogenase complex, mitochondrial | DLST     | 2.18 (↑) | 0.193 |
| 218. | Nascent polypeptide-associated complex subunit alpha-2                                                           | NACA     | 2.10 (↑) | 0.084 |
| 219. | Isoform 2 of nucleoside diphosphate kinase A                                                                     | NME1     | 1.98 (↑) | 0.122 |
| 220. | Similar to hCG1812668                                                                                            | RPL26P14 | 4.64 (↑) | 0.196 |
| 221. | hnRNP H2                                                                                                         | HNRNPH2  | 1.25 (↑) | 0.580 |
| 222. | Heat shock protein HSP 90-beta                                                                                   | HSP90AB1 | 1.48 (↑) | 0.486 |
| 223. | 60S ribosomal protein L22                                                                                        | RPL22    | 1.66 (↑) | 0.413 |

|      |                                                                                                                  |               |           |       |
|------|------------------------------------------------------------------------------------------------------------------|---------------|-----------|-------|
| 224. | Similar to 60S ribosomal protein L17                                                                             | Ribosomal L22 | 1.66 (↑)  | 0.413 |
| 225. | Phosphoglycerate kinase 1                                                                                        | PGK1          | 2.77 (↑)  | 0.080 |
| 226. | cDNA FLJ60076, highly similar to ELAV-like protein 1                                                             | ELAVL1        | 1.10 (↑)  | 0.805 |
| 227. | Topoisomerase (DNA) I                                                                                            | TOP1          | 1.94 (↑)  | 0.340 |
| 228. | Isoform 1 of apoptotic chromatin condensation inducer in the nucleus                                             | ACIN1         | 2.078 (↑) | 0.291 |
| 229. | Highly similar to probable ATP-dependent RNA helicase DDX5                                                       | DDX5          | 1.47 (↑)  | 0.026 |
| 230. | Putative uncharacterized protein WIBG (Fragment)                                                                 | WIBG          | 2.12 (↑)  | 0.124 |
| 231. | Ribosomal protein S8                                                                                             | RPS8          | 1.01 (↑)  | 0.998 |
| 232. | Kinesin-1 heavy chain                                                                                            | KIF5B         | 1.01 (↑)  | 0.970 |
| 233. | Prohibitin variant (fragment)                                                                                    | PHB           | 1.49 (↑)  | 0.109 |
| 234. | cDNA FLJ59206, highly similar to Eukaryotic translation initiation factor 4B                                     | EIF4B         | 1.25 (↑)  | 0.771 |
| 235. | RBM4 Isoform 1 of RNA-binding protein 4                                                                          | RBM4          | 1.11 (↑)  | 0.472 |
| 236. | HIST1H2BF; histone cluster 1, H2bg                                                                               | HIST1H2BF     | 1.22 (↑)  | 0.507 |
| 237. | NME2; NME1 Nucleoside diphosphate kinase                                                                         | NME2          | 1.98 (↑)  | 0.122 |
| 238. | Putative uncharacterized protein IMMT                                                                            | IMMT          | 1.40 (↑)  | 0.516 |
| 239. | Isoform 1 of High mobility group protein 20A                                                                     | HMG20A        | 1.49 (↑)  | 0.555 |
| 240. | Isoform 2 of LIM domain only protein 7                                                                           | LMO7          | 2.70 (↑)  | 0.326 |
| 241. | Heterogeneous nuclear ribonucleoprotein H2                                                                       | RPL36AP37     | 1.25 (↑)  | 0.580 |
| 242. | Isoform 1 of Splicing factor, arginine/serine-rich 7                                                             | SFRS7         | 2.96 (↑)  | 0.012 |
| 243. | Tubulin-specific chaperone A                                                                                     | TBCA          | 3.54 (↑)  | 0.234 |
| 244. | Dihydrolipoyllysine-residue succinyltransferase component of 2-oxoglutarate dehydrogenase complex, mitochondrial | DLSTP         | 2.18 (↑)  | 0.193 |
| 245. | Lon protease homolog                                                                                             | LONP1         | 1.62 (↑)  | 0.416 |
| 246. | TKT Transketolase                                                                                                | TKT           | 3.63 (↑)  | 0.285 |

|      |                                                                              |          |          |        |
|------|------------------------------------------------------------------------------|----------|----------|--------|
| 247. | Basement membrane-specific heparan sulfate proteoglycan core protein variant | HSPG2    | 3.49 (↑) | 0.137  |
| 248. | UMP-CMP kinase 1 isoform a                                                   | CMPK1    | 1.53 (↑) | 0.658  |
| 249. | Putative uncharacterized protein CTNNA1                                      | CTNNA1   | 1.64 (↑) | 0.375  |
| 250. | ACIN1 apoptotic chromatin condensation inducer 1 isoform 3                   | ACIN1    | 2.07 (↑) | 0.291  |
| 251. | Alpha-actinin-4                                                              | ACTN4    | 1.35 (↑) | 0.312  |
| 252. | 28 kDa protein                                                               | ARHGDI1  | 1.68 (↑) | 0.703  |
| 253. | ATP5O ATP synthase subunit O, mitochondrial                                  | ATP5O    | 1.14 (↑) | 0.836  |
| 254. | Cofilin-1                                                                    | CFL1     | 1.65 (↑) | 0.359  |
| 255. | Isoform DPI of Desmoplakin                                                   | DSP      | 2.15 (↑) | 0.003  |
| 256. | Eukaryotic translation initiation factor 3 subunit A                         | EIF3A    | 1.23 (↑) | 0.498  |
| 257. | Isoform 2 of Electron transfer flavoprotein subunit beta                     | ETFB     | 1.23 (↑) | 0.665  |
| 258. | Putative rRNA methyltransferase 3                                            | FTSJ3    | 1.14 (↑) | 0.817  |
| 259. | Histone H4                                                                   | HIST1H4K | 1.11 (↑) | 0.618  |
| 260. | Isoform 1 of Heterochromatin protein 1-binding protein 3                     | HP1BP3   | 1.10 (↑) | 0.727  |
| 261. | Prefoldin subunit 2                                                          | PFDN2    | 1.02 (↑) | 0.962  |
| 262. | RPS18P9; RPS18 40S ribosomal protein S18                                     | RPS18    | 2.08 (↑) | 0.269  |
| 263. | FUBP1 Putative uncharacterized protein FUBP1                                 | FUBP1    | 1.69 (↑) | 0.291  |
| 264. | Tubulin alpha-1B chain                                                       | TUBA1B   | 5.18 (↑) | 0.198  |
| 265. | PDLIM5 PDZ and LIM domain protein 5                                          | PDLIM5   | 2.33 (↑) | 0.280  |
| 266. | Isoform 2 of Polypyrimidine tract-binding protein 1                          | PTBP1    | 1.95 (↑) | 0.688  |
| 267. | PRSS1 28 kDa protein                                                         | PRSS1    | 2.15 (↑) | 0.0483 |
| 268. | Programmed cell death protein 5                                              | PDCD5    | 1.27 (↑) | 0.833  |
| 269. | RPS28 40S ribosomal protein S28                                              | RPS28    | 1.22 (↑) | 0.687  |
| 270. | Peptidyl-prolyl cis-trans isomerase A                                        | PPIA     | 1.70 (↑) | 0.265  |
